# Supplementary material for: Curcumin Alleviates DSS‐Induced Anxiety‐Like Behaviors via the Microbial‐Brain‐Gut Axis
Source: Hindawi journal article supplement (doi:10.1155/2022/6244757), 2022-01-01

A

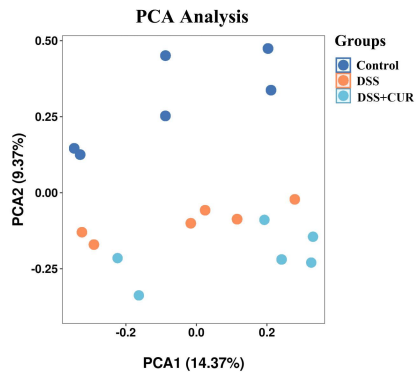

B

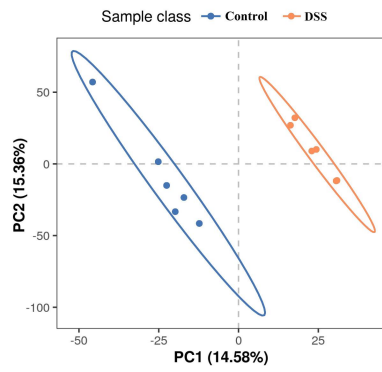

C

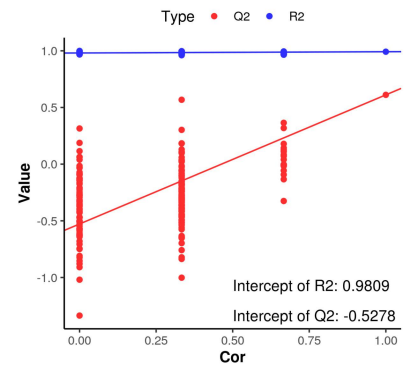

D

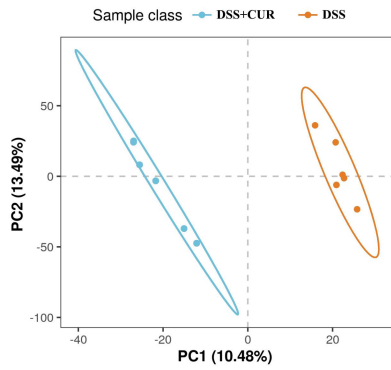

E

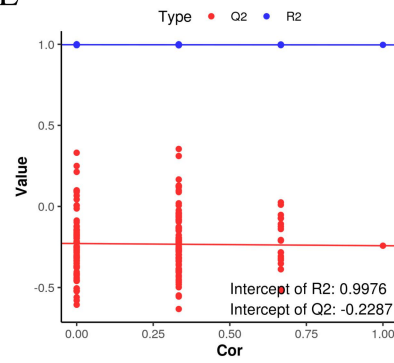

F

**KEGG Enrichment Scatter Plot**

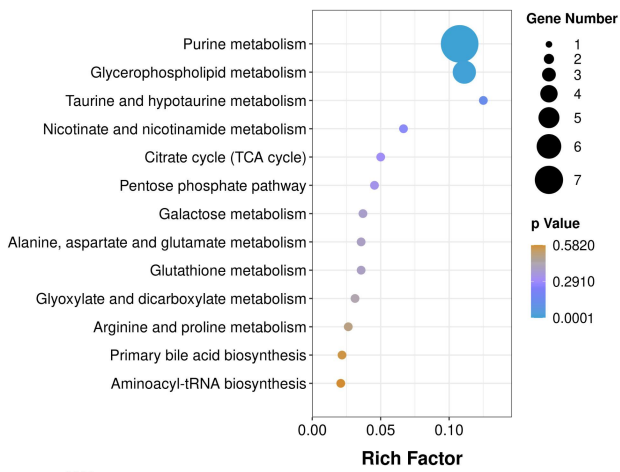

G

**KEGG Enrichment Scatter Plot**

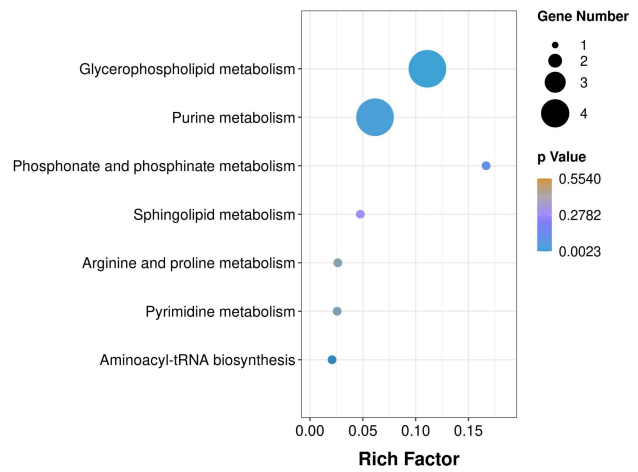

H

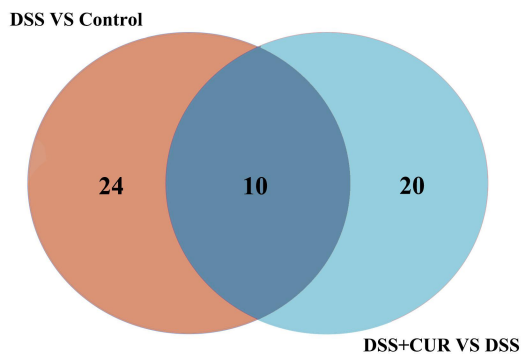

I

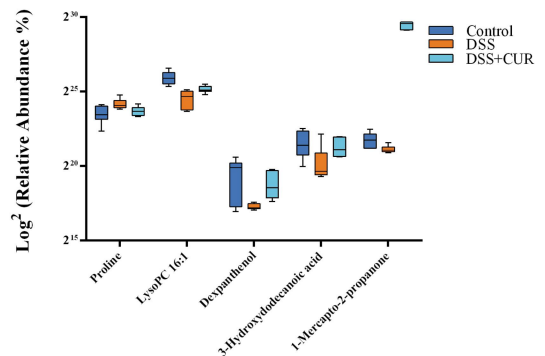

Supplement: f3 [file 6244757.f3.pdf]
