# Supplementary material for: Curcumin Alleviates DSS‐Induced Anxiety‐Like Behaviors via the Microbial‐Brain‐Gut Axis
Source: Hindawi journal article supplement (doi:10.1155/2022/6244757), 2022-01-01

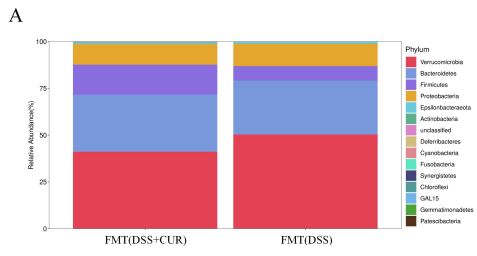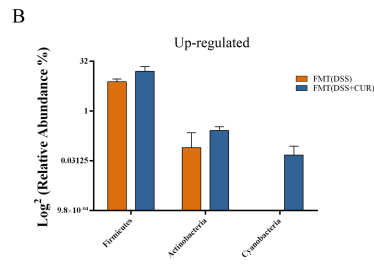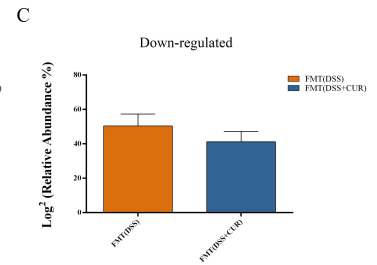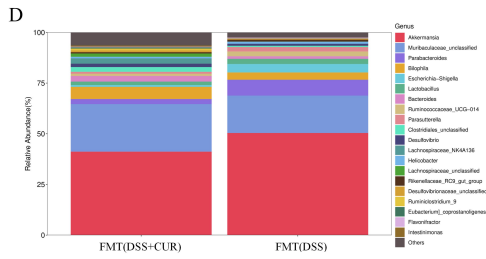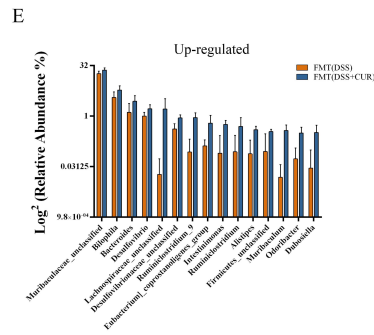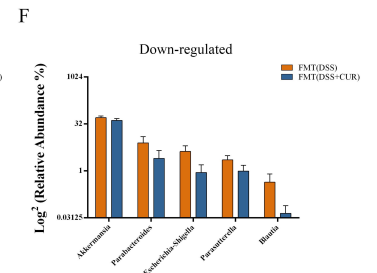

Supplement: f5 [file 6244757.f5.pdf]
